# Supplementary material
Source: PubMed Central journal article supplement (PMC2813342)

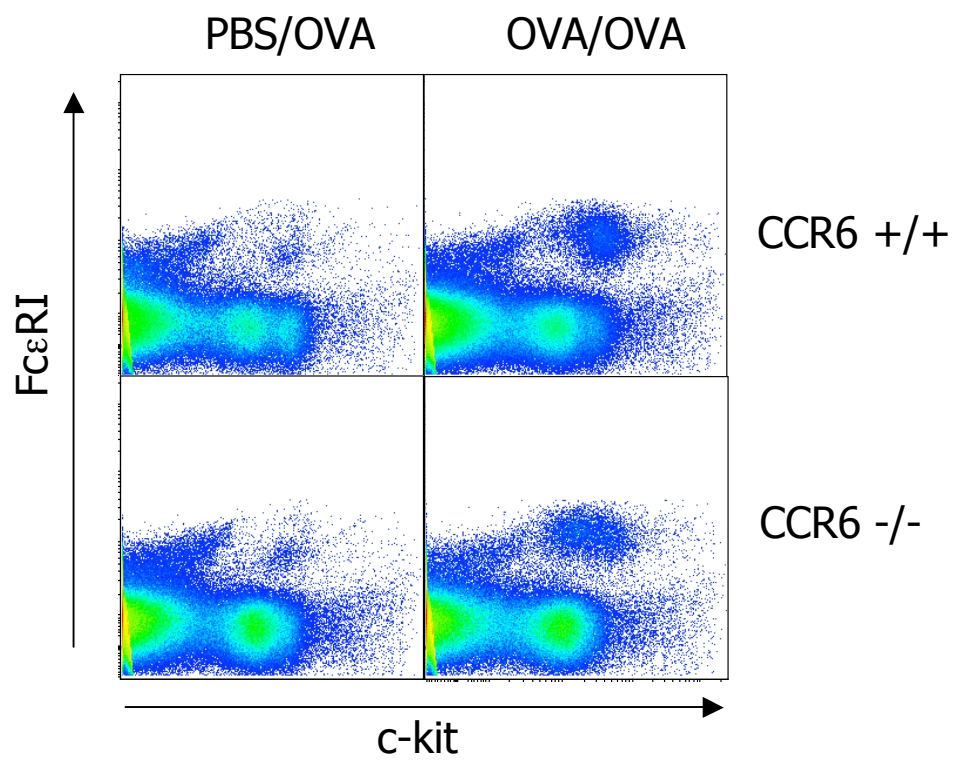

Blázquez, Fig S1

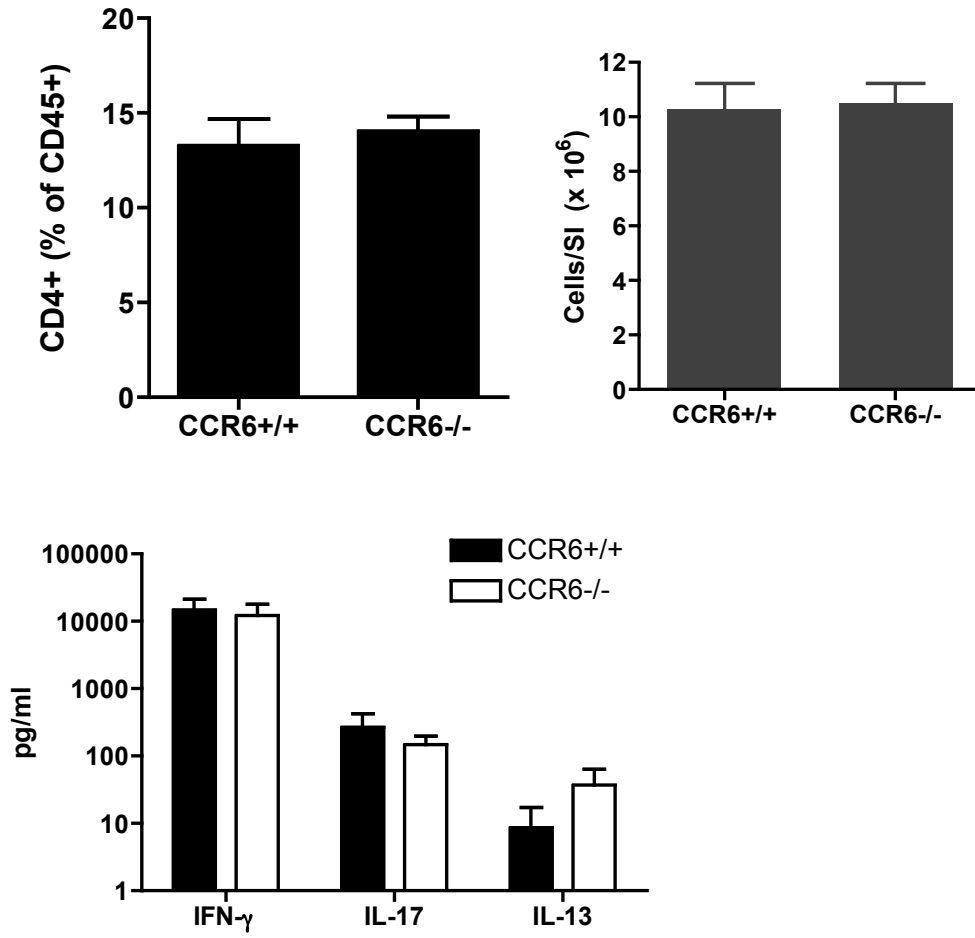

Blázquez, Fig S2

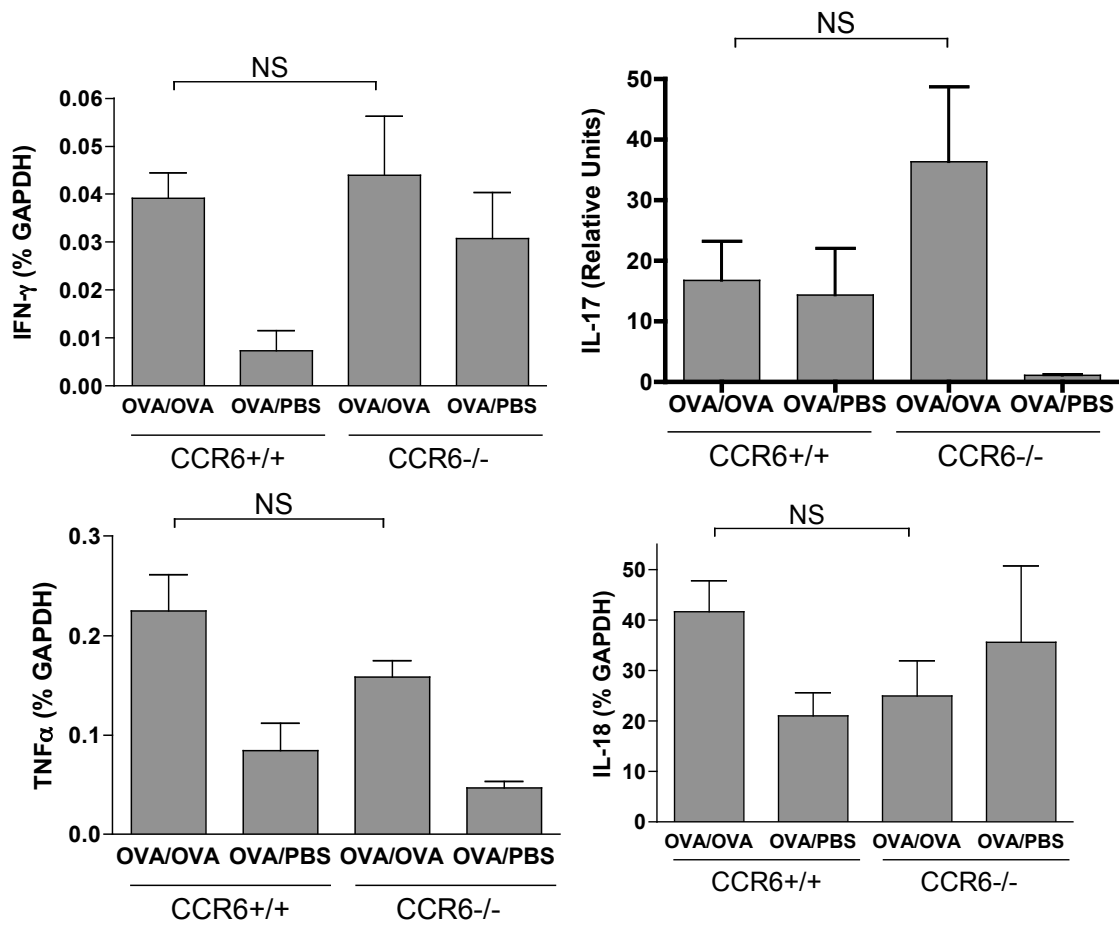

Blázquez, Fig S3

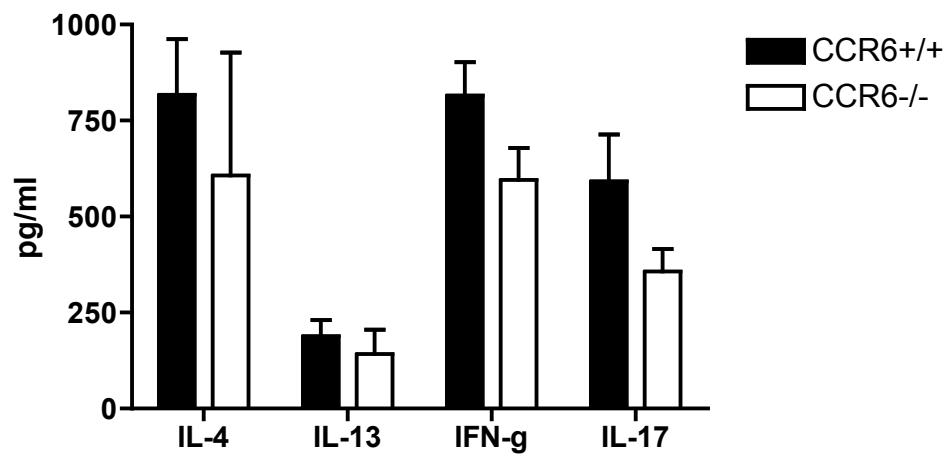

Blázquez, Fig S4

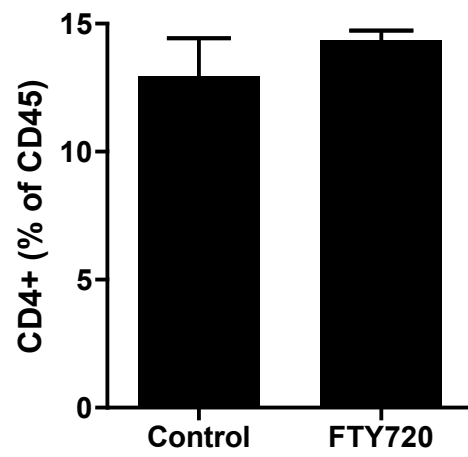

Blázquez, Fig S5

Supplement: NIHMS148282-supplement-01.pdf [file NIHMS148282-supplement-01.pdf]
